# Supplementary material for: Response Surface‐Based Finite Element Model Updating of Steel Box‐Girder Bridges with Concrete Composite Decks
Source: Hindawi journal article supplement (doi:10.1155/2022/4298933), 2022-01-01
Supplement: f1 [file 4298933.f1.docx]

**Box-Behnken Design**

| **Experiment number** | **Modulus of elasticity of SFRC**  **（×104MPa）** | **Density of SFRC**  **（kg/m3）** | **Thickness of SFRC（mm）** | **Temperature of epoxy asphalt（℃）** | **Modulus of elasticity of steel box girder（×105MPa）** |  |  |  |  |  |  |
| --- | --- | --- | --- | --- | --- | --- | --- | --- | --- | --- | --- |
| 1 | 3.45 | 2400 | 130 | 30 | 2.1 | 3.77 | 4.99 | 5.3 | 7.47 | 11.96 | 14.95 |
| 2 | 3.45 | 2400 | 160 | 30 | 1.68 | 3.36 | 4.55 | 5.11 | 7.34 | 11.68 | 14.69 |
| 3 | 3.45 | 2400 | 100 | 0 | 2.1 | 3.93 | 5.2 | 5.45 | 7.68 | 12.3 | 15.38 |
| 4 | 3.45 | 2000 | 130 | 30 | 1.68 | 3.56 | 4.83 | 5.29 | 7.65 | 12.14 | 15.31 |
| 5 | 3.45 | 2400 | 130 | 0 | 2.52 | 4.08 | 5.28 | 5.49 | 7.54 | 12.17 | 15.08 |
| 6 | 3.45 | 2400 | 100 | 30 | 2.52 | 4.16 | 5.4 | 5.48 | 7.6 | 12.23 | 15.2 |
| 7 | 4 | 2400 | 100 | 30 | 2.1 | 3.92 | 5.19 | 5.43 | 7.67 | 12.27 | 15.35 |
| 8 | 3.45 | 2400 | 130 | 30 | 2.1 | 3.77 | 4.99 | 5.3 | 7.47 | 11.96 | 14.95 |
| 9 | 2.9 | 2800 | 130 | 30 | 2.1 | 3.62 | 4.8 | 5.1 | 7.22 | 11.54 | 14.44 |
| 10 | 4 | 2400 | 130 | 30 | 2.52 | 4.08 | 5.29 | 5.5 | 7.54 | 12.19 | 15.1 |
| 11 | 2.9 | 2400 | 130 | 30 | 2.52 | 4 | 5.19 | 5.34 | 7.39 | 11.9 | 14.78 |
| 12 | 2.9 | 2400 | 130 | 60 | 2.1 | 3.72 | 4.93 | 5.2 | 7.36 | 11.76 | 14.72 |
| 13 | 3.45 | 2400 | 130 | 60 | 1.68 | 3.44 | 4.66 | 5.14 | 7.44 | 11.81 | 14.89 |
| 14 | 3.45 | 2400 | 130 | 0 | 1.68 | 3.48 | 4.72 | 5.23 | 7.54 | 11.98 | 15.08 |
| 15 | 3.45 | 2800 | 130 | 30 | 1.68 | 3.35 | 4.54 | 5.04 | 7.29 | 11.58 | 14.6 |
| 16 | 3.45 | 2400 | 100 | 60 | 2.1 | 3.87 | 5.13 | 5.33 | 7.57 | 12.08 | 15.14 |
| 17 | 2.9 | 2400 | 100 | 30 | 2.1 | 3.84 | 5.1 | 5.29 | 7.51 | 11.99 | 15.04 |
| 18 | 3.45 | 2800 | 160 | 30 | 2.1 | 3.55 | 4.69 | 5.14 | 7.19 | 11.54 | 14.39 |
| 19 | 4 | 2400 | 130 | 60 | 2.1 | 3.8 | 5.02 | 5.36 | 7.52 | 12.05 | 15.06 |
| 20 | 2.9 | 2400 | 130 | 30 | 1.68 | 3.42 | 4.63 | 5.09 | 7.39 | 11.71 | 14.78 |
| 21 | 3.45 | 2400 | 130 | 30 | 2.1 | 3.77 | 4.99 | 5.3 | 7.47 | 11.96 | 14.95 |
| 22 | 2.9 | 2400 | 130 | 0 | 2.1 | 3.77 | 4.99 | 5.31 | 7.46 | 11.96 | 14.95 |
| 23 | 3.45 | 2400 | 160 | 60 | 2.1 | 3.66 | 4.84 | 5.23 | 7.32 | 11.74 | 14.65 |
| 24 | 3.45 | 2400 | 160 | 30 | 2.52 | 3.94 | 5.09 | 5.37 | 7.34 | 11.87 | 14.69 |
| 25 | 4 | 2400 | 160 | 30 | 2.1 | 3.71 | 4.9 | 5.33 | 7.4 | 11.91 | 14.83 |
| 26 | 3.45 | 2400 | 130 | 60 | 2.52 | 4.03 | 5.22 | 5.39 | 7.44 | 12 | 14.89 |
| 27 | 3.45 | 2400 | 100 | 30 | 1.68 | 3.55 | 4.82 | 5.22 | 7.6 | 12.04 | 15.2 |
| 28 | 3.45 | 2000 | 130 | 60 | 2.1 | 3.88 | 5.13 | 5.41 | 7.62 | 12.2 | 15.26 |
| 29 | 4 | 2800 | 130 | 30 | 2.1 | 3.7 | 4.89 | 5.26 | 7.37 | 11.82 | 14.75 |
| 30 | 3.45 | 2400 | 160 | 0 | 2.1 | 3.71 | 4.89 | 5.32 | 7.4 | 11.89 | 14.8 |
| 31 | 3.45 | 2800 | 130 | 0 | 2.1 | 3.69 | 4.88 | 5.25 | 7.36 | 11.81 | 14.74 |
| 32 | 2.9 | 2400 | 160 | 30 | 2.1 | 3.63 | 4.8 | 5.16 | 7.25 | 11.62 | 14.51 |
| 33 | 3.45 | 2000 | 130 | 0 | 2.1 | 3.93 | 5.19 | 5.51 | 7.72 | 12.38 | 15.45 |
| 34 | 3.45 | 2400 | 130 | 30 | 2.1 | 3.77 | 4.99 | 5.3 | 7.47 | 11.96 | 14.95 |
| 35 | 3.45 | 2800 | 100 | 30 | 2.1 | 3.79 | 5.02 | 5.26 | 7.45 | 11.91 | 14.91 |
| 36 | 3.45 | 2000 | 100 | 30 | 2.1 | 3.99 | 5.28 | 5.47 | 7.75 | 12.38 | 15.51 |
| 37 | 3.45 | 2400 | 130 | 30 | 2.1 | 3.77 | 4.99 | 5.3 | 7.47 | 11.96 | 14.95 |
| 38 | 4 | 2400 | 130 | 0 | 2.1 | 3.85 | 5.08 | 5.45 | 7.6 | 12.21 | 15.22 |
| 39 | 4 | 2000 | 130 | 30 | 2.1 | 3.94 | 5.2 | 5.51 | 7.72 | 12.39 | 15.47 |
| 40 | 3.45 | 2400 | 130 | 30 | 2.1 | 3.77 | 4.99 | 5.3 | 7.47 | 11.96 | 14.95 |
| 41 | 3.45 | 2800 | 130 | 30 | 2.52 | 3.92 | 5.08 | 5.29 | 7.29 | 11.77 | 14.6 |
| 42 | 4 | 2400 | 130 | 30 | 1.68 | 3.49 | 4.72 | 5.24 | 7.54 | 11.99 | 15.1 |
| 43 | 2.9 | 2000 | 130 | 30 | 2.1 | 3.85 | 5.1 | 5.35 | 7.56 | 12.1 | 15.15 |
| 44 | 3.45 | 2000 | 160 | 30 | 2.1 | 3.81 | 5.03 | 5.4 | 7.55 | 12.11 | 15.11 |
| 45 | 3.45 | 2800 | 130 | 60 | 2.1 | 3.65 | 4.83 | 5.16 | 7.27 | 11.63 | 14.55 |
| 46 | 3.45 | 2000 | 130 | 30 | 2.52 | 4.17 | 5.41 | 5.55 | 7.65 | 12.34 | 15.31 |
